# Supplementary material for: Ecosystems Monitoring Powered by Environmental Genomics: A Review of Current Strategies with An Implementation Roadmap
Source: Preprints.org preprint supplement (doi:10.20944/preprints202001.0278.v1), 2020-01-24
Supplement: Supplementary file 3 [file supplementary]

## Sheet: Table 1
Table 1: List of studies employing environmental genomics tools for ecosystem monitoring sorted by monitoring strategy, ecosystem, targeted taxonomic group and objective
Strategy	Sub-category	Ecosystem	Environmental sample	Targeted taxonomic group	Molecular methodology	Objective / pressure	Reference
A	Screening species	Tropical forest soil	Soil	Litter arthropods	metaB (COI)	Land use change	Beng et al., 2016
A	Screening species	Terrestrial	Soil	Focus on arthropods	metaG	Arthropods inventory	Zhou et al., 2013
A	Screening species	Terrestrial	Bulk (traps)	Arthropods	metaB (COI)	Comparison morphology / molecular	Yinqiu et al. 2013
A	Screening species	Freshwater	Water	Eukaryotes (freshwater + terrestrial)	metaB (COI)	Regional biodiversity inventory	Deiner et al., 2016
A	Screening species	Freshwater	Bulk (water)	Macroinvertebrates	metaB (COI)	Comparison morphology / molecular	Hajibabaei et al., 2011
A	Screening species	Freshwater	Bulk (water)	Macroinvertebrates	metaB (COI)	Comparison morphology / molecular	Hajibabaei et al., 2012
A	Screening species	Freshwater	Bulk (water)	Macroinvertebrates	metaB (COI)	Comparison morphology / molecular	Gibson et al., 2015
A	Screening species	Freshwater	Water	Eukaryotes	metaB (18S)	Comparison morphology / molecular	Banerji et al. 2018
A	Screening species	Freshwater	Water	Ciliates	metaB (18S)	Comparison morphology / molecular	Pitsch et al. 2019
A	Screening species	Freshwater	Water	Diatoms	metab (18S)	Comparison morphology / molecular	Zimmermann et al. 2014
A	Screening species	Prairie wetlands	Soil	Plants	metaB (plastidrbcL,matK, ITS2,trnL)	Proof of principle / biodiversity inventory	Fahner et al. 2016
A	Screening species	Tropical marine	Water	Eukaryotes	metaG + metaB	Eukaryotic biodiversity inventory	Stat et al., 2017
A	Screening species	Marine	Water	Fishes	metaB (cytb)	Biodiversity inventory	Thomsen et al., 2012
A	Screening species	Marine	Water	Elasmobranch	metaB (COI)	Sharks inventory	Bakker et al., 2017
A	Screening species	Coastal artic	Water	Animals	metaB (COI)	Invasive species detection	Lacoursière-Roussel et al., 2018
A	Screening species	Marine (ballast waters)	Water	Non indigenous species	metaB (18S)	Invasive species detection	Pagenkopp Lohan et al., 2016
A	Screening species	Marine	Bulk (water)	Non indigenous species	metaB (COI)	Invasive species detection	Zaiko et al., 2015
A	Screening species	Estuarine	Bulk (sediment)	Benthic macroinvertebrates	metaB (COI)	Biodiversity inventory	Lobo et al., 2017
A	Screening species	Marine	Water	Non indigenous species	metaB (18S + COI)	Invasive species detection	Borrell et al., 2017
A	Screening species	Marine	Water	Non indigenous species	metaB (18S + COI)	Invasive species detection	Grey et al. 2018
A	Screening species	Marine	Water	Non indigenous species	metaB (18S + COI)	Invasive species detection	Holman et al., 2019
A	Screening species	Marine	Water	Eukaryotes (focus on zoolankton)	metaB (18S)	Comparison morphology / molecular	Bucklin et al., 2019
A	Screening species	Freshwater + marine	Water	Fish and amphibians	metab (custom mtDNA primers)	Comparison morphology / molecular	Valentini et al. 2016
A	Screening species	Marine	Water	Eukaryotes	metaB (18S + COI)	Biodiversity inventory	Stefanni et al., 2018
A	Screening number of individuals	Marine	Water	Whale shark (Rhincodon typus)	mito. haplotype signatures	Proof of principle / population size monitoring	Sigsgaard et al., 2016
A	Screening bioindicators (BIs)	Freshwater	Bulk (water)	Macroinvertebrates	metaB (COI)	Comparison morphology / molecular	Elbrecht et al., 2017
A	Screening bioindicators (BIs)	Freshwater	Biofilm	Diatoms	metaB (18S)	Euthrophication	Visco et al., 2015
A	Screening bioindicators (BIs)	Freshwater	Biofilm	Diatoms	metaB (COI + 18S + rbcL)	Euthrophication	Kermarrec et al., 2013
A	Screening bioindicators (BIs)	Freshwater	Biofilm	Diatoms	metaB (COI + 18S + rbcL)	Euthrophication	Kermarrec et al., 2014
A	Screening bioindicators (BIs)	Freshwater	Biofilm	Diatoms	metaB (rbcL)	Euthrophication	Vasselon et al., 2017
A	Screening bioindicators (BIs)	Freshwater	Biofilm	Diatoms	metaB (rbcL)	Euthrophication	Kelly et al., 2018
A	Screening bioindicators (BIs)	Freshwater	Biofilm	Diatoms	metaB (rbcL)	Euthrophication	Rivera et al., 2018
A	Screening bioindicators (BIs)	Freshwater	Sediment	Oligochaetes	metaB (COI)	Euthrophication	Vivien et al., 2016
A	Screening bioindicators (BIs)	Marine	Sediment	Benthic macroinvertebrates	metaB (18S)	Aquaculture	Lejzerowicz et al., 2015
A	Screening bioindicators (BIs)	Marine and estuarine	Sediment	Benthic macroinvertebrates	metaB (COI)	Organic pollution, nutrient enrichment and hydrological modifications	Aylagas et al., 2018
A	Screening bioindicators (BIs)	Marine and estuarine	Sediment	Bacteria + Archaea	metaB (16S)	Organic pollution, nutrient enrichment and hydrological modifications	Aylagas et al., 2017
B	Bioindicators discovery	Drinking water containers	Water	Bacteria	metaB (16S)	Drinking water quality (insect larvae)	Nilsson et al., 2018
B	Bioindicators discovery	Freshwater	Sediment	Bacteria	metaB (16S)	Agricultural pesticides	Salis et al., 2017
B	Bioindicators discovery	Freshwater	Sediment	Bacteria	metaB (16S)	Urban pollution	Simonin et al., 2019
B	Bioindicators discovery	Freshwater	Water	Bacteria + (animals + arthropods, morpho)	qPCR (16S + functional genes)	Pesticides spill	Thompson et al., 2016
B	Bioindicators discovery	Freshwater	Bulk (water)	Macroinvertebrates	metaB (COI + 18S)	Pesticides spill	Andùjar et al., 2018
B	Bioindicators discovery	Freshwater	Sediment	Bacteria + Archaea	metaB (16S)	Treated and untreated wastewater influence	Martínez-Santos et al., 2018
B	Bioindicators discovery	Marine	Water	Picoplankton (Bacteria + Eukaryotes)	metaB (16S + 18S)	Organic and inorganic nutrient enrichment	Ferrera et al., 2016
B	Bioindicators discovery	Marine and estuarine	Water	Bacteria + Archaea	metaB (16S)	Costal pollution (baseline study)	Angly et al., 2016
B	Bioindicators discovery (and functional)	Marine	Water	Bacteria	metaB (16S) + metaG	Offshore drilling	McFarlin et al,. 2017
B	Indicator discovery (+ screening BIs)	Marine	Sediment + Water	Benthic and pelagic Eukaryotes	metaB (mt16S + 18S + COI)	Offshore drilling	Cordier et al., 2019
B	Bioindicators discovery	Marine	Sediment	Eukaryotes	metaB (18S)	Oil spill	Bik et al., 2012
B	Bioindicators discovery	Marine	Sediment	Eukaryotes	metaB (18S)	Offshore drilling	Lanzén et al., 2016
B	Bioindicators discovery	Marine	Sediment	Benthic foraminifera	metaB (18S)	Offshore drilling	Laroche et al., 2016
B	Bioindicators discovery	Marine	Sediment	Bacteria + Eukaryotes	metaB (16S + 18S)	Offshore drilling	Laroche et al., 2018
B	Bioindicators discovery	Marine	Sediment	Benthic foraminifera	metaB (18S)	Aquaculture	Pochon et al., 2015
B	Bioindicators discovery	Marine	Sediment	Benthic foraminifera	metaB (18S)	Mercury pollution (mesocosm)	Frontalini et al., 2018
B	Bioindicators discovery	Marine	Sediment	Bacteria + Archaea	metaB (16S)	Aquaculture	Dowle et al., 2015
B	Bioindicators discovery	Marine	Sediment	Bacteria	metaB (16S)	Aquaculture	Stoeck et al., 2018
B	Bioindicators discovery	Marine	Sediment	Bacteria + Eukaryotes	metaB (16S + 18S)	Aquaculture	Keeley et al., 2018
B	Bioindicators discovery	Marine	Sediment	Bacteria + Archaea + Eukaryotes	metaB (16S + 18S)	Ocean acidification and oil pollution	Coelho et al., 2016
B	Bioindicators discovery (and functional)	Marine	Water + sediment	Focus on microbes / functional profiles	metaG	Coastal pollution	Kisand et al., 2012
B	Bioindicators discovery	Estuarine	Sediment	Eukaryotes	metaB (18S)	Euthrophication	Chariton et al., 2010, 2015
B	Bioindicators discovery	Estuarine	Sediment	Eukaryotes	metaB (18S)	Historical impacts and salinity gradient	Lallias et al., 2015
B	Bioindicators discovery	Marine	Sediment	Eukaryotes	metaB (18S)	Influence of artificial structures / “reefs”	Klunder et al., 2018
B	Bioindicators discovery (and functional)	Marine	Sediment	Bacteria	metaB (16S)	Offshore drilling	Nguyen et al., 2018
B	Bioindicators discovery	Estuarine	Sediments	Bacteria + Archaea	metaB (16S)	Focus on organic pollution (PAHs)	Obi et al. 2016
B	Bioindicators discovery	Mescocosm	Sediments, Water	Eukaryotes	metaB (18S)	Copper	Gardham et al. 2014
B	Bioindicators discovery	Mescocosm	Sediments	Eukaryotes	metaB (18S)	Triclosan	Chariton et al. 2014
B	Bioindicators discovery	Ephemeral river	Soils	Eukaryotes	metaB (18S)	Drought on ephemeral rivers	Baldwin et al. 2013
B	Alpha-diversity and dissimilarity (baseline for indicator discovery)	Freshwater	Water	Eukaryotes	metaB (18S)	Organic pollution, nutrient enrichment and hydrological modifications	Bagley et al., 2019
B	Alpha-diversity and dissimilarity (baseline for indicator discovery)	Marine	Sediment	Foraminifera	metaB (18S)	Aquaculture	He et al., 2019
B	Alpha-diversity and dissimilarity (baseline for indicator discovery)	Marine (deep-sea canyons)	Sediment	Eukaryotes	metaB (18S)	Baseline diversity	Guardiola et al. 2016
B	Supervised learning and predictions	Freshwater	Biofilm	Diatoms	metaB (18S)	Euthrophication	Apothéloz et al., 2017
B	Supervised learning and predictions	Freshwater	Biofilm	Diatoms	metaB (rbcL)	Euthrophication	Tapolczai et al., 2019
B	Supervised learning and predictions	Freshwater	Water (filtered)	Bacteria + Eukaryotes	metaB (16S + 18S)	Euthrophication	Li et al., 2018
B	Supervised learning and predictions	Marine	Sediment	Bacteria + Archaea	metaB (16S)	Oil spil	Smith et al., 2015
B	Supervised learning and predictions	Marine	Sediment	Foraminifera	metaB (18S)	Aquaculture	Cordier et al., 2017
B	Supervised learning and predictions	Marine	Sediment	Bacteria + Eukaryotes	metaB (16S + 18S)	Aquaculture	Cordier et al., 2018
B	Supervised learning and predictions	Marine ports	Water (filtered)	Bacteria	metaB (16S)	Ballast water origin	Gerhard & Gunsch, 2019
B	Supervised learning and predictions	Estuaries	Sediments	Eukaryotes	metaB (18S)	Eutrophication	Graham et al. 2019
B	Alpha and phylogeny-aware metrics	Terrestrial	Soil	Bacteria	metaB (16S)	Fire impact	Pérez-Valera et al., 2017
C	Alpha and phylogeny-aware metrics	Terrestrial	Soil	Bacteria	metaB (16S)	Nitrogen enrichment	Liu et al., 2017
C	Alpha and phylogeny-aware metrics	Freshwater	Water	Bacteria	barcoding (16S)	Microbial productivity (manipulative experiment)	Venail & Vives, 2013
C	Alpha and phylogeny-aware metrics	Freshwater	Biofilm	Diatoms	barcoding (rbcL)	Euthrophication	Keck & Kahlert, 2019
C	Alpha and phylogeny-aware metrics	Marine	Sediment	Bacteria + Archaea + Functional profiles	metaB (16S) + metaG	Mechanical turbulence (experiment)	Galand et al., 2016
C	Alpha and phylogeny-aware metrics	Marine	Sediment	Bacteria	metaB (16S)	Aquaculture	Stoeck et al., 2018
C	Alpha and phylogeny-aware metrics	Marine	Sediment	Benthic foraminifera	metaB (18S)	Aquaculture	Pawlowski et al., 2014
C	Alpha and phylogeny-aware metrics	Marine	Sediment	Benthic foraminifera	metaB (18S)	Aquaculture	Pawlowski et al., 2016
C	Alpha and phylogeny-aware metrics	Marine	Water (filtered)	Bacteria	metaB (16S)	Microbial productivity	Galand et al., 2015
C	Co-occurrence networks metrics	Terrestrial	Soil	Bacteria	metaB (16S)	Experimental CO2 enrichment	Zhou et al., 2011
C	Co-occurrence networks metrics	Terrestrial	Soil	Bacteria	metaB (16S)	Land use variation	Lupatini et al., 2014
C	Co-occurrence networks metrics	Terrestrial	Soil	Bacteria + Fungi	metaB (16S + ITS)	Mining dump impact	Zappelini et al., 2015
C	Co-occurrence networks metrics	Terrestrial	Soil	Bacteria	metaB (16S)	Fire impact	Pérez-Valera et al., 2017
C	Co-occurrence networks metrics	Agriculture	Phyllosphere	Fungi	metaB (ITS)	Pesticides impact	Pauvert et al., 2019
C	Co-occurrence networks metrics	Freshwater	Water (filtered)	Bacteria + Eukaryotes	metaB (16S + 18S)	Euthrophication	Li et al., 2018
C	Co-occurrence networks metrics	Marine	Sediment	Bacteria (+ invertebrates)	metaB (16S)	Organic enrichment and metal pollution	Lawes et al., 2017
C	Co-occurrence networks metrics + functional profiles	Marine	Sediment	Bacteria	metaB (16S)	Offshore drilling	Laroche et al., 2018
C	Functional profiles	Terrestrial	Soil	Functional profiles	metaT	Hydrocarbon poluttion	de Menezes et al., 2012
C	Functional profiles	Groundwater	Water (filtered)	Functional profiles	metaG	Organic and inorganic nutrient enrichment	Hemme et al., 2015
C	Functional profiles	Groundwater	Water (filtered)	Functional profiles	GeoChip microarray	Organic and inorganic nutrient enrichment	He et al., 2018
C	Functional profiles	Freshwater	Water (filtered)	Animals + arthropods + bacteria	qPCR (16S + functional genes)	Pesticides spill	Thompson et al., 2016
C	Functional profiles	Freshwater	Water (filtered)	Functional profiles	metaG	Polymetallic pollution	Cheaib et al., 2018
C	Functional profiles	Freshwater	Sediment	Functional profiles	metaT	Hydrocarbon and metals pollution	Falk et al., 2019
C	Functional profiles	Marine (coastal)	Sediment	Functional profiles	MetaG + MetaT	Organic enrichment and metal contamination	Birrer et al., 2019
C	Functional profiles	Marine	Water + sediment	Functional profiles	metaG	Coastal pollution	Kisand et al., 2012
C	Functional profiles	Marine	Sediment	Bacteria + Archaea + Functional profiles	metaB (16S) + metaG	Mechanical turbulence (experiment)	Galand et al., 2016
C	Functional profiles (and bioindicator discovery)	Marine	Water	Bacteria	metaB (16S) + metaG	Offshore drilling	McFarlin et al,. 2017
C	Functional profiles	Marine	Sediment	Bacteria	metaB (16S) + tax4fun	Aquaculture	Cordier, 2019 (in press)
C	Functional profiles	Arctic cryosphere	Cryoconite	Functional profiles	metaG	Global contaminant dispersion	Hauptmann et al. 2017
C	Functional profiles	Coastal salt marsh	Sediment	Functional + structural profiles	Geochip and Phylochip microarrays	Oil spill	Beazley et al., 2012

## Sheet: Table 2
Table 2: Comparison of the three strategies in term of compatibility with current standards, backward and forward compatibility, performance, biodiversity coverage, generalization potential and ease of standardization
Monitoring strategy	Sub-category	Compatibility with current standards	Backward and forward compatibility	Performance for implemented system	Potential biodiversity coverage*	Spatio-temporal generalization potential	Ease of standardization
A) Taxonomy-based	Screening species	+++	++	+++	++	+	+
A) Taxonomy-based	Screening bioindicators (BIs)	+++	++	++	+	+	+
B) De novo	Bioindicators discovery	—	—	—	+++	++	+
B) De novo	Supervised learning and predictions	+++	+++	+++	+++	++	+
C) Function-based	Alpha and phylogeny-aware metrics	+ (alpha)	—	+	+++	+	+
C) Function-based	Co-occurrence networks metrics	—	—	—	+++	+++	+
C) Function-based	Functional profiles	—	—	—	+++	+++	+++
* : depends on molecular methodology (amplicon versus shotgun) if amplicon, it will depends on PCR primers selection, e.g. universal eukaryotes and prokaryptes versus arthropods, diatoms or fungi
